# Supplementary material for: Placebo-Controlled, Double-Blind Study of Empagliflozin (EMPA) and Implantable Cardioverter-Defibrillator (EMPA-ICD) in Patients with Type 2 Diabetes (T2DM): Rationale and Design
Source: Springer Nature journal article supplement (doi:10.1007/s13300-020-00924-9), 2020-09-23
Supplement: MOESM1 [file 18409352]

■Site 1：Tachikawa Medical Center, Tachikawa General Hospital

■Investigators：Masaaki Okabe, Minoru Takahashi, Hitoshi Kitazawa, Yoshio Ikeda, Satoru Fujita, Koichi Fuse, Akimitsu Nasuno, Akinori Sato, Sho Yuasa, Yusuke Ota, Sonoka Goto, Ryota Ando

**********************************************************************

■Site 2：Kitasato University Hospital

■Investigators：

Shinichi Niwano, Hidehira Fukaya, Jun Kishihara, Jun Oikawa, Naruya Ishizue, Yuki Shirakawa, Shunsuke Ishii, Takeru Nabeta

**********************************************************************

■Site 3：Kumamoto University Hospital

■Investigators：

Kenichi Tsujita, Hiroaki Kawano, Koichi Kaikita, Hirofumi Soejima, Eiichiro Yamamoto, Satoru Suzuki, Kenji Sakamoto, Taishi Nakamura, Hiroki Usuku, Satoshi Araki, Yuichiro Arima, Seiji Takashio, Hisanori Kanazawa, Daisuke Sueta, Tadashi Hoshiyama, Koichiro Fujisue, Miwa Ito, Fumi Oike, Ryota Sato, Masafumi Takae, Masato Nishi, Kenshi Yamanaga, Takashi Komorita, Yusei Kawahara, Mami Morioka, Yuji Kubota

**********************************************************************

■Site 4：Gunma Prefectural Cardiovascular Center

■Investigators：Shigeto Naito, Kohki Nakamura, Takehito Sasaki

**********************************************************************

■Site 5：Kokura Memorial Hospital

■Investigators：Kenji Ando, Kenichi Hiroshima, Michio Nagashima, Masato Fukunaga, Jun Hirokami

**********************************************************************

■Site 6：National Cerebral and Cardiovascular Center

■Investigators：

Takashi Noda, Yuko Inoue, Kouhei Ishibashi, Mitsuru Wada, Tsukasa Kamakura, Kenichirou Yamagata, Koji Miyamoto, kenzaburou Nakajima, Nobuhiko Ueda, Terunobu Wakamiya, Yasutaka Sato, Keiko Shimamoto, Hiroyuki Kamada, Keisuke Suzuki, Reina Tonegawa, Yasuhiro Yokoyama, Kiminori Hosoda, Hisashi Makino, Yoko Ohata, Tamiko Tamanaha, Ryo Koezuka, Masaki Matsubara, Mariko Shiba, Cheol Son, Tsutomu Tomita, Michio Noguchi

**********************************************************************

■Site 7：Saitama Medical University International Medical Center

■Investigators：Ritsushi Kato, Yoshie Nakajima, Yoshifumi Ikeda, Kenta Tsutsui

**********************************************************************

■Site 8：Sakakibara Heart Institute

■Investigators：Junichi Nitta, Jun Umemura, Kanki Inoue

**********************************************************************

■Site 9：Sapporo Medical University School of Medicine

■Investigators：Tetsuji Miura, Daigo Nagahara

**********************************************************************

■Site 10：Jichi Medical University Saitama Medical Center

■Investigators：Tomio Umemoto, Yusuke Ugata, Shingo Yamamoto, Naoyuki Akashi

**********************************************************************

■Site 11：Jichi Medical University School of Medicine

■Investigators：Takahiro Komori, Tomoyuki Kabutoya, Kazuomi Kario

■Site 12：Department of Cardiovascular Medicine, Chiba University Graduate School of Medicine

■Investigators：Yusuke KONDO, Yoshio Kobayashi

**********************************************************************

■Site 13：University of Tsukuba

■Investigators：Masaki Ieda, Miyako Igarashi, Hiro Yamasaki, Yuki Komatsu, Akira Kimata

**********************************************************************

■Site 14：Tokyo Women's Medical University

■Investigators：Nobuhisa Hagiwara, Morio Shoda, Atsushi Suzuki

**********************************************************************

■Site 15：Nagoya University Graduate School of Medicine

■Investigators：Toyoaki Murohara, Yasuya Inden

**********************************************************************

■Site 16：Niigata City General Hospital

■Investigators：Kazuyoshi Takahashi, Yukio Hosaka

**********************************************************************

■Site 17：Niigata University Medical & Dental Hospital

■Investigators：Shinya Fujiki, Kenichi Iijima, Ippei Shimizu, Tohru Minamino

**********************************************************************

■Site 18：Hirosaki University Hospital

■Investigators：Hirofumi Tomita, Shingo Sasaki, Daisuke Horiuchi, Yuji Ishida, Takahiko Kinjo, Kimitaka Nishizsaki

**********************************************************************

■Site 19：Fukushima Medical University Hospital

■Investigators：Yasuchika Takeishi, Takashi Kaneshiro, Shinya Yamada, Naoko Hijioka

**********************************************************************

■Site 20：Hokkaido University Graduate School of Medicine

■Investigators：Toshihisa Anzai, Masaya Watanabe, Taro Koya, Motoki Nakao

**********************************************************************

■Site 21：Nippon Medical School

■Investigators：Wataru Shimizu, Yu-ki Iwasaki, Kenji Yodogawa, Hiroshi Hayashi, Yoshiaki Kubota, Oka Eiichiro

**********************************************************************

■Site 22：Kanazawa University Hospital

■Investigators：Takeshi Kato, Masayuki Takamura, Hiroshi Furusho, Kenshi Hayashi, Toyonobu Tsuda, Satoru Niwa, Keisuke Usuda

**********************************************************************

■Site 23：Shiga University of Medical Science

■Investigators：Yoshihisa Nakagawa, Tomoya Ozawa, Yusuke Okuyama

**********************************************************************

■Site 24：Department of Cardiovascular Medicine, Nagasaki University Graduate School of Biomedical Sciences

■Investigators：Koji MAEMURA, Satoki FUKAE, Yoshiyuki DOI, Shuji ARAKAWA

**********************************************************************

■Site 25：University of Fukui Hospital

■Investigators：Hiroshi Tada, Kanae Hasegawa, Moe Mukai

**********************************************************************

■Site 26：Yamagata University Hospital

■Investigators：Masafumi Watanabe, Takanori Arimoto, Daisuke Kutsuzawa

**********************************************************************

■Site 27：Yamaguchi University Graduate School of Medicine

■Investigators：Masakazu Fukuda, Yasuhiro Yoshiga, Takayoshi Kato, Masafumi Yano

**********************************************************************

■Site 28：Iwate Medical University Hospital

■Investigators：Shingen Owada, Reisuke Yoshizawa, Takashi Komatsu, Yohei Sawa

**********************************************************************

■Site 29：Kyoto University Hospital

■Investigators：Takeshi Kimura, Yugo Yamashita

**********************************************************************

■Site 30：Niigata University Medical & Dental Hospital

■Investigators：Takashi Saikawa, Tohru Watanabe, Hiromi Kayamori, Hiroshi Onoda, Takayuki Kumaki, Sho Hirayama

**********************************************************************

■Site 31：Juntendo University Hospital

■Investigators：Hidemori Hayashi, Haruna Tabuchi

**********************************************************************

■Site 32：Juntendo University Urayasu Hospital

■Investigators：Takashi Tokano, Fuminori Odagiri
